# Supplementary material for: Use of Antibiotics among Residents Living Close to Poultry or Goat Farms: A Nationwide Analysis in The Netherlands
Source: MDPI journal article supplement (doi:10.3390/antibiotics10111346), 2021-11-04
Supplement: s1 [file s1]

## Supplementary Materials

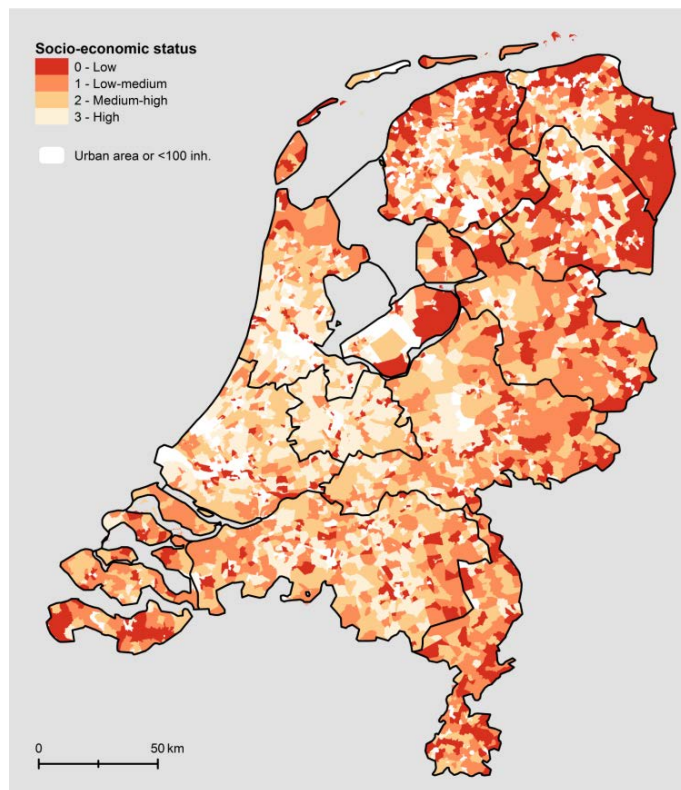

**Figure S1.** Socio-economic status score at 4-digit postal code level in The Netherlands in 2014 (0: low (score < -0.22), 1: low-medium ( $-0.22 \leq \text{score} < 0.42$ ), 2: medium-high ( $0.42 \leq \text{score} < 0.96$ ) and 3: high (score  $\geq 0.96$ )). Urban areas and areas with less than 100 inhabitants are displayed in white.

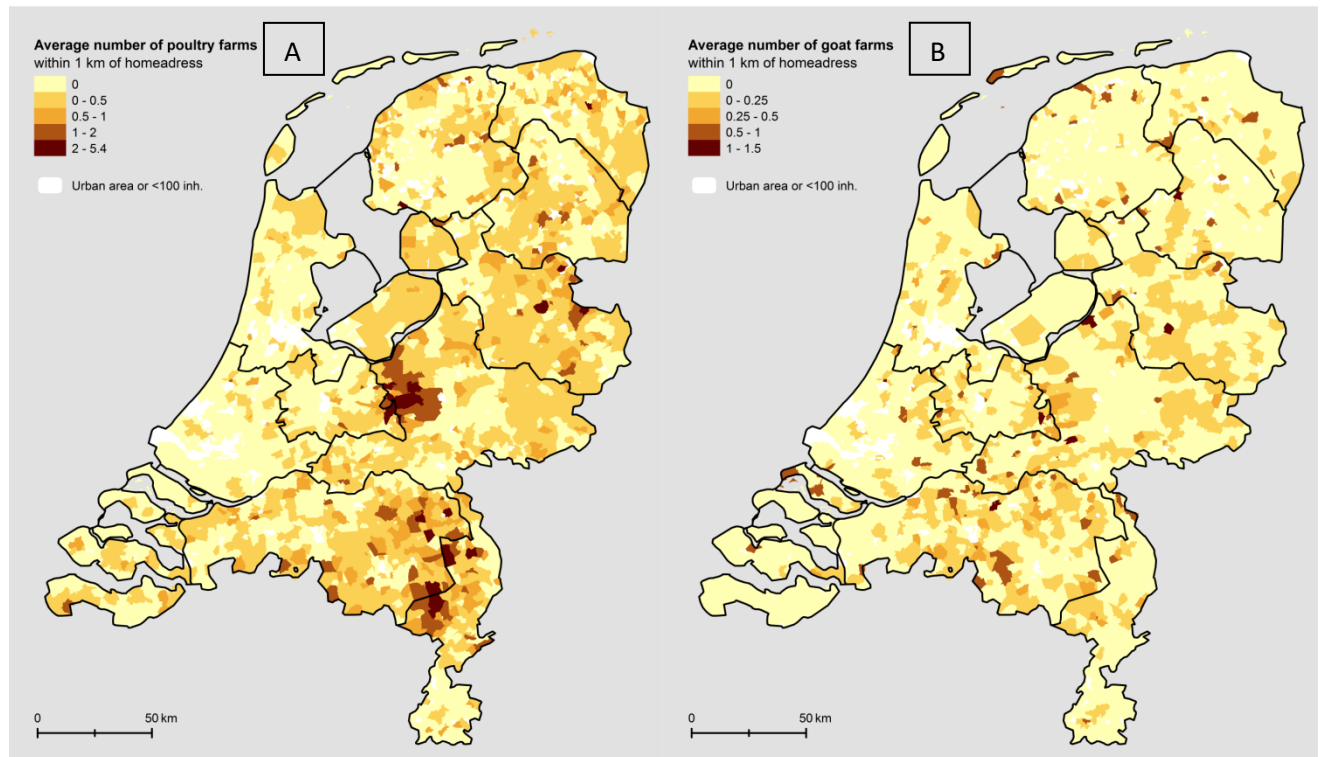

**Figure S2.** Average number of livestock farms within 1 km of home address in the Netherlands in 2015. **A.** poultry farms. **B.** Goat farms. Urban areas and areas with less than 100 inhabitants are displayed in white.

**Table S1.** Associations between presence of poultry and goat farms and antibiotic use per type of antibiotic from negative binomial regression, stratified by season

|                              | Winter months <sup>§</sup>      |                                     | Other months <sup>§</sup>      |                                   |
|------------------------------|---------------------------------|-------------------------------------|--------------------------------|-----------------------------------|
| <b>Poultry farm presence</b> | <b>Crude ratio*<br/>[95%CI]</b> | <b>Adjusted ratio**<br/>[95%CI]</b> | <b>Crude ratio<br/>[95%CI]</b> | <b>Adjusted ratio<br/>[95%CI]</b> |
| Amoxicillin                  | 1.09*** [1.05-1.13]             | 1.06 [1.03-1.09]                    | 1.07 [1.03-1.10]               | 1.04 [1.01-1.07]                  |
| Doxycycline                  | 1.15 [1.10-1.20]                | 1.10 [1.06-1.15]                    | 1.16 [1.11-1.21]               | 1.11 [1.06-1.16]                  |
| Co-amoxiclav                 | 1.09 [1.05-1.14]                | 1.05 [1.02-1.09]                    | 1.07 [1.04-1.11]               | 1.05 [1.02-1.08]                  |
| Nitrofurantoin               | 1.06 [1.02-1.11]                | 1.00 [0.97-1.05]                    | 1.07 [1.02-1.12]               | 1.00 [0.96-1.05]                  |
| <b>Goat farm presence</b>    | <b>Crude ratio<br/>[95%CI]</b>  | <b>Adjusted ratio<br/>[95%CI]</b>   | <b>Crude ratio<br/>[95%CI]</b> | <b>Adjusted ratio<br/>[95%CI]</b> |
| Amoxicillin                  | 1.04 [1.00-1.09]                | 1.01 [0.97-1.05]                    | 1.04 [1.00-1.09]               | 1.02 [0.99-1.06]                  |
| Doxycycline                  | 1.08 [1.02-1.14]                | 1.04 [0.99-1.09]                    | 1.06 [1.00-1.12]               | 1.02 [0.97-1.08]                  |
| Co-amoxiclav                 | 1.05 [1.00-1.10]                | 1.02 [0.98-1.06]                    | 1.00 [0.96-1.05]               | 0.98 [0.95-1.02]                  |
| Nitrofurantoin               | 1.09 [1.03-1.16]                | 1.04 [0.98-1.10]                    | 1.08 [1.03-1.15]               | 1.03 [0.98-1.09]                  |

In all models, PC4 was included as random factor. CI: Confidence Interval; PC4: 4-position Postal Code.

\* Exponential of the estimate; \*\* Corrected for SES, age, gender, smoking and presence of goat/poultry farms;

\*\*\* Interpretation ratio: the amoxicillin use was 9% higher in the UDPs with poultry farms; <sup>§</sup> Winter months: November to March; other months: April to October.

**Table S2.** Associations between presence of poultry and goat farms and antibiotic use per type of antibiotic from negative binomial regression, for livestock dense area only.

| <b>Poultry farm presence</b> | <b>Crude ratio* [95%CI]</b> | <b>Adjusted ratio** [95%CI]</b> |
|------------------------------|-----------------------------|---------------------------------|
| Amoxicillin                  | 1.07*** [1.03-1.11]         | 1.06 [1.03-1.10]                |
| Doxycycline                  | 1.07 [1.02-1.13]            | 1.05 [1.00-1.10]                |
| Co-amoxiclav                 | 1.07 [1.03-1.12]            | 1.05 [1.01-1.09]                |
| Nitrofurantoin               | 1.09 [1.03-1.15]            | 1.00 [0.95-1.05]                |
| <b>Goat farm presence</b>    | <b>Crude ratio [95%CI]</b>  | <b>Adjusted ratio [95%CI]</b>   |
| Amoxicillin                  | 1.04 [1.00-1.08]            | 1.01 [0.98-1.05]                |
| Doxycycline                  | 1.02 [0.97-1.08]            | 1.00 [0.95-1.05]                |
| Co-amoxiclav                 | 1.03 [0.98-1.08]            | 1.00 [0.96-1.04]                |
| Nitrofurantoin               | 1.09 [1.02-1.16]            | 0.96 [0.90-1.01]                |

In all models, PC4 was included as random factor. CI: Confidence Interval; PC4: 4-position Postal Code.

\* Exponential of the estimate; \*\* Corrected for SES, age, gender, smoking and presence of goat/poultry farms;

\*\*\* Interpretation ratio: the amoxicillin use was 7% higher in the UDPs with poultry farms.

**Table S3.** Associations between presence of poultry and goat farms and antibiotic use per type of antibiotic from negative binomial regression, for female gender only.

| <b>Poultry farm presence</b> | <b>Crude ratio* [95%CI]</b> | <b>Adjusted ratio** [95%CI]</b> |
|------------------------------|-----------------------------|---------------------------------|
| Amoxicillin                  | 1.06*** [1.03-1.09]         | 1.04 [1.01-1.07]                |
| Doxycycline                  | 1.12 [1.07-1.17]            | 1.09 [1.05-1.13]                |
| Co-amoxiclav                 | 1.09 [1.05-1.13]            | 1.06 [1.03-1.10]                |
| Nitrofurantoin               | 1.08 [1.04-1.13]            | 1.03 [1.00-1.07]                |
| <b>Goat farm presence</b>    | <b>Crude ratio [95%CI]</b>  | <b>Adjusted ratio [95%CI]</b>   |
| Amoxicillin                  | 1.02 [0.98-1.06]            | 1.02 [0.98-1.06]                |
| Doxycycline                  | 1.02 [0.97-1.07]            | 1.01 [0.99-1.06]                |
| Co-amoxiclav                 | 0.99 [0.95-1.04]            | 0.97 [0.93-1.01]                |
| Nitrofurantoin               | 1.09 [1.03-1.15]            | 1.04 [1.00-1.08]                |

In all models, PC4 was included as random factor. CI: Confidence Interval; PC4: 4-position Postal Code.

\* Exponential of the estimate; \*\* Corrected for SES, age, gender, smoking and presence of goat/poultry farms;

\*\*\* Interpretation ratio: the amoxicillin use was 6% higher in the UDPs with poultry farms.
